# Supplementary material for: Combining ultraconserved elements and mtDNA data to uncover lineage diversity in a Mexican highland frog (Sarcohyla; Hylidae)
Source: PeerJ journal article supplement (doi:10.7717/peerj.6045), 2018-12-11
Supplement: SUpp_edit2.pdf [file SUpp_edit2.pdf]

1 Table S1. Information and summary statistics on all 45 samples used to determine the ingroup  
 2 for this study.

3

| Field Number | UMMZ Number | Current Taxonomy                | State     | Locality                                                                                                                                                           | Latitude  | Longitude   | Trimmed Paired Reads | UCEs | Average UCE length | mtDNA reads | mtDNA average coverage | mtDNA average quality | Fig 1 Map Number | mtDNA Accession |
|--------------|-------------|---------------------------------|-----------|--------------------------------------------------------------------------------------------------------------------------------------------------------------------|-----------|-------------|----------------------|------|--------------------|-------------|------------------------|-----------------------|------------------|-----------------|
| MK 618       | UMMZ 239796 | <i>Sarcophya bistincta</i>      | MICHOACAN | LOS AZUFRES / SAN PEDRO ROAD                                                                                                                                       | 19.791051 | -100.660542 | 1,889,670            | 2323 | 529.7              | 3381        | 20.8                   | 86                    | 1                |                 |
| MK 627-31    | UMMZ 239683 | <i>Sarcophya bistincta</i>      | MICHOACAN | PARQUE BARRANCA DEL CUPATITZIO URUAPAN                                                                                                                             | 19.426646 | -102.073574 | 1,933,019            | 2254 | 370.9              | 3415        | 20.8                   | 85                    | 2                |                 |
| MK 666       | UMMZ 239745 | <i>Sarcophya bistincta</i>      | MICHOACAN | 13 KMS ROAD ZITACUARO MACHERO (LITTLE TOWN WHERE THERE IS A MONARCH BUTTERFLY SANCTUARY)                                                                           | 19.3452   | -100.3128   | 2,186,871            | 2350 | 621.3              | 3900        | 23.4                   | 83                    | 3                | MH899567        |
| MK 600       | UMMZ 239679 | <i>Sarcophya bistincta</i>      | MEXICO    | CARRETERA VALLE DE BRAVO-SAN PEDRO TENEYAC ARROYO 1 (6860 FEET) (POR ALBARRADA)                                                                                    | 19.150083 | -100.1469   | 932,448              | 2174 | 500.8              | 2377        | 15.7                   | 83                    | 4                | MH899566        |
| MK 600 (1)   | UMMZ 239678 | <i>Sarcophya bistincta</i>      | MEXICO    | CARRETERA VALLE DE BRAVO-SAN PEDRO TENEYAC ARROYO 1 (6860 FEET) (POR ALBARRADA)                                                                                    | 19.150083 | -100.1469   | 1,217,987            | 2267 | 532.8              | 2570        | 16.4                   | 84                    | 4                |                 |
| MK 645       | UMMZ 239749 | <i>Sarcophya bistincta</i>      | MORELOS   | BOSQUE BIEN CONSERVADO Y HUMEDO OF LA BARRANCA WHERE THE SALTO SAN ANTONIO IS                                                                                      | 18.922402 | -99.244151  | 2,217,054            | 2406 | 532.5              | 3494        | 21.8                   | 86                    | 5                |                 |
| MK 645 dupe  | UMMZ 239749 | <i>Sarcophya bistincta</i>      | MORELOS   | 2 KMS OUT OF CUERNAVACA ON THE CUERNAVACA CHALMA RD. (PASSING CONJUNTO CERRADO) OF LA BARRANCA WHERE THE SALTO SAN ANTONIO IS                                      | 18.922402 | -99.244151  | 548,585              | 1964 | 513.0              | 841         | 7.4                    | 60                    | 5                |                 |
| MK 759       | UMMZ 239701 | <i>Sarcophya bistincta</i>      | GUERRERO  | CA 100 DEG KMS FROM CIUDAD ALTAMIRANO VIA IXTAPA ZIHUATANEJO                                                                                                       | 18.0013   | -101.1716   | 1,224,835            | 2199 | 557.6              | 2522        | 16.2                   | 84                    | 6                | MH899573        |
| MK 760       | UMMZ 239705 | <i>Sarcophya bistincta</i>      | GUERRERO  | CA 100 DEG KMS FROM CIUDAD ALTAMIRANO VIA IXTAPA ZIHUATANEJO                                                                                                       | 18.0013   | -101.1716   | 1,074,315            | 2203 | 559.4              | 743         | 6.9                    | 58                    | 6                |                 |
| MK 760 (2)   | UMMZ 239704 | <i>Sarcophya bistincta</i>      | GUERRERO  | CA 100 DEG KMS FROM CIUDAD ALTAMIRANO VIA IXTAPA ZIHUATANEJO                                                                                                       | 18.0013   | -101.1716   | 927,774              | 2246 | 579.2              | 906         | 9.4                    | 6                     | 6                |                 |
| MK 691 (5)   | UMMZ 239744 | <i>Sarcophya bistincta</i>      | GUERRERO  | 2-3 KMS IN THE ROAD TO JALEACA FROM POINT WHERE ROAD TRIFURCATE TO PTO. DEL GALLO / YEXTLA / ANDIALEACA.COMMING FROM CARRIZAL DE BRAVO / IN RIVER UNDER THE BRIDGE | 17.5324   | -99.8994    | 2,084,203            | 2353 | 672.5              | 1678        | 11.9                   | 80                    | 7                |                 |
| MK 650 (1)   | UMMZ 239725 | <i>Sarcophya bistincta</i>      | GUERRERO  | MOUNTAINS W. OF CHILPANINGO / TOWN LOS MORROS                                                                                                                      | 17.6843   | -99.80339   | 941,101              | 2124 | 556.6              | 1278        | 9.7                    | 74                    | 8                |                 |
| MK 650 (2)   | UMMZ 239726 | <i>Sarcophya bistincta</i>      | GUERRERO  | MOUNTAINS W. OF CHILPANINGO / TOWN LOS MORROS                                                                                                                      | 17.6843   | -99.80339   | 2,224,898            | 2394 | 506.4              | 1737        | 12.2                   | 79                    | 8                |                 |
| MK 652       | UMMZ 239727 | <i>Sarcophya bistincta</i>      | GUERRERO  | MOUNTAINS W. OF CHILPANINGO / TOWN LOS MORROS                                                                                                                      | 17.6843   | -99.80339   | 3,423,330            | 2444 | 526.0              | 1396        | 10.4                   | 74                    | 8                | MH899571        |
| MK 671 (4)   | UMMZ 239733 | <i>Sarcophya bistincta</i>      | GUERRERO  | BEHIND CHICHIHUALCO / ON ROAD TO CARRIZAL DE BRAVO / 2 KMS FROM ENTRONQUE                                                                                          | 17.6407   | -99.6797    | 1,012,300            | 2107 | 557.0              | 842         | 7.4                    | 62                    | 9                |                 |
| MK 672       | UMMZ 239738 | <i>Sarcophya bistincta</i>      | GUERRERO  | BEHIND CHICHIHUALCO / ON ROAD TO CARRIZAL DE BRAVO / 2 KMS FROM ENTRONQUE                                                                                          | 17.6407   | -99.6797    | 297,782              | 1667 | 439.8              | 400         | 5.1                    | 41                    | 9                |                 |
| MK 656 (1)   | UMMZ 239729 | <i>Sarcophya bistincta</i>      | GUERRERO  | 3 KMS FROM THE TOWN OF OMLITEME IN THE ROAD OMLITEME CHILPANINGO                                                                                                   | 17.552603 | -99.662569  | 580,194              | 1950 | 497.6              | 547         | 5.9                    | 42                    | 10               |                 |
| MK 674 (1)   | UMMZ 239690 | <i>Sarcophya bistincta</i>      | GUERRERO  | ON ATZACUALOYA HUEYCATENANGO RD.                                                                                                                                   | 17.5087   | -99.1258    | 659,418              | 1941 | 565.4              | 1086        | 8.7                    | 68                    | 11               |                 |
| MK 675 (2)   | UMMZ 239879 | <i>Sarcophya bistincta</i>      | GUERRERO  | ON ATZACUALOYA HUEYCATENANGO RD.                                                                                                                                   | 17.5087   | -99.1258    | 336,474              | 1565 | 519.1              | 227         | 4.2                    | 24                    | 11               |                 |
| MK 662       | UMMZ 239731 | <i>Sarcophya bistincta</i>      | GUERRERO  | 1.6 KMS FROM THE TOWN OF TETIPAC ON THE TETIPAC TAXCO ROAD (MAYBE ARROYO LAS DAMAS)                                                                                | 18.635895 | -99.6491    | 1,137,742            | 2130 | 548.7              | 796         | 7.2                    | 56                    | 12               | MH899572        |
| MK 697 (3)   | UMMZ 239789 | <i>Sarcophya bistincta</i>      | VERACRUZ  | ON ATZOMPA XXOCOTLA RD. 1.5 KMS FROM XXOCOTLA                                                                                                                      | 18.6585   | -97.1574    | 1,524,182            | 2214 | 625.6              | 2479        | 16.0                   | 82                    | 13               |                 |
| MK 699 (1)   | UMMZ 239791 | <i>Sarcophya bistincta</i>      | VERACRUZ  | ON STREAM CROSSING THE TOWN OF XXOCOTLA                                                                                                                            | 18.6477   | -97.1574    | 1,342,010            | 2206 | 610.9              | 1769        | 12.3                   | 79                    | 13               |                 |
| MK 700 (2)   | UMMZ 239750 | <i>Sarcophya bistincta</i>      | PUEBLA    | IN THE STREAM LOCATED AFTER THE TOWN OF ZQUITLAN TURNING DOWN AT THE CENTRO DE SALUD                                                                               | 18.322    | -97.0285    | 2,203,360            | 2298 | 697.8              | 4155        | 24.8                   | 86                    | 14               |                 |
| MK 705 (1)   | UMMZ 239862 | <i>Sarcophya bistincta</i>      | OAXACA    | 56 KMS FROM TEOITILAN VIA HUAUTLA                                                                                                                                  | 18.1576   | -96.8684    | 2,529,703            | 2417 | 644.6              | 3164        | 19.6                   | 85                    | 15               |                 |
| MK 715       | UMMZ 239755 | <i>Sarcophya bistincta</i>      | OAXACA    | NEAR "EL TEJOCOTE" (FRENTE AL KINDER)                                                                                                                              | 17.239    | -97.0032    | 347,152              | 1712 | 437.7              | 254         | 4.3                    | 31                    | 16               |                 |
| MK 716 (1)   | UMMZ 239758 | <i>Sarcophya bistincta</i>      | OAXACA    | ON ROAD BETWEEN THE TOWNS OF SAN JUAN DEL ESTADO AND SAN MIGUEL ALDAPAN                                                                                            | 17.3036   | -96.793     | 52,461               | 594  | 267.4              | 8           | 3.0                    | 1                     | 17               |                 |
| MK 718 (2)   | UMMZ 239765 | <i>Sarcophya bistincta</i>      | OAXACA    | PASSING SAN MIGUEL ALDAPAN                                                                                                                                         | 17.4211   | -96.6876    | 606,978              | 2014 | 568.6              | 366         | 4.9                    | 37                    | 18               |                 |
| MK 755 (1)   | UMMZ 239786 | <i>Sarcophya bistincta</i>      | OAXACA    | ON ROAD SAN JUAN ATEPEC SAN MIGUEL ABEJONES                                                                                                                        | 17.4153   | -96.5671    | 871,034              | 2062 | 563.2              | 1022        | 8.4                    | 69                    | 19               |                 |
| MK 751       | UMMZ 239785 | <i>Sarcophya bistincta</i>      | OAXACA    | 3.8 KMS PASSING "RANCHO TEXAS" ON THE ROAD FROM THE TOWN OF IXTLAN DE JUAREZ                                                                                       | 17.316    | -96.4435    | 1,577,190            | 2342 | 621.5              | 2376        | 15.4                   | 84                    | 20               | MH899574        |
| MK 748 (2)   | UMMZ 239780 | <i>Sarcophya bistincta</i>      | OAXACA    | CA 37 KMS FROM MITLA ON THE ROAD MITLA AYUTLA                                                                                                                      | 16.9791   | -96.1364    | 91,912               | 1009 | 302.5              | 23          | 3.1                    | 3                     | 22               |                 |
| MK 748 (4)   | UMMZ 239782 | <i>Sarcophya bistincta</i>      | OAXACA    | CA 37 KMS FROM MITLA ON THE ROAD MITLA AYUTLA                                                                                                                      | 16.9791   | -96.1364    | 1,058,426            | 2170 | 553.8              | 499         | 5.7                    | 42                    | 22               |                 |
| MK 767       | UMMZ 239788 | <i>Sarcophya bistincta</i>      | OAXACA    | 9.2 KMS E STA MARIA ALBARRADAS / SIERRA MIXE                                                                                                                       | 16.985888 | -96.135816  | 1,083,058            | 2206 | 524.7              | 617         | 6.3                    | 52                    | 22               |                 |
| MK 721       | UMMZ 239767 | <i>Sarcophya bistincta</i>      | OAXACA    | 2 KMS N. THE TOWN OF STA. MARIA LAXICHIO VIA THE TOWN OF SAN SEBASTIAN RIO DULCE                                                                                   | 16.7377   | -97.0384    | 146,471              | 1215 | 376.0              | 62          | 3.3                    | 10                    | 23               |                 |
| MK 766       | UMMZ 239794 | <i>Sarcophya bistincta</i>      | OAXACA    | CERRO DE VIDRIO VIA A PUERTO ESCONDIDO                                                                                                                             | 16.25216  | -97.15359   | 994,521              | 2166 | 577.4              | 467         | 5.5                    | 43                    | 24               |                 |
| MK 730 (2)   | ?           | <i>Sarcophya bistincta</i>      | ?         | ?                                                                                                                                                                  |           |             | 2,967,630            | 2404 | 716.9              | 3581        | 21.7                   | 84                    |                  |                 |
| MK 685 (2)   | UMMZ 239739 | <i>Sarcophya bistincta</i>      | GUERRERO  | ON ATOYAC PTO DE GALLO RD. / BETWEEN 10 - 20 KMS NORTH OF THE TOWN "EL PARAISO"                                                                                    | 17.3812   | -100.2009   | 269,729              | 1645 | 450.6              | 184         | 4.0                    | 20                    | 25               | MH899575        |
| MK 689 (2)   | UMMZ 239740 | <i>Sarcophya bistincta</i>      | GUERRERO  | ON ATOYAC PTO DEL GALLO RD. / 500 M. NORTH OF THE TOWN OF SAN VICENTE                                                                                              | 17.3      | -100.2792   | 67,313               | 502  | 221.6              | 32          | 3.1                    | 6                     | 26               |                 |
| MK 727 (2)   | UMMZ 239772 | <i>Sarcophya pentheter</i>      | OAXACA    | RIO "EL SALADO" / 8 KMS N SAN JUAN LACHAO ON HWY 135                                                                                                               | 16.1916   | -97.0958    | 17,052               | 381  | 247.1              | 10          | 3.0                    | 2                     | 27               | MH899576        |
| MK 691 (3)   | UMMZ 239651 | <i>Plectrohyla chryses</i>      | GUERRERO  | 2-3 KMS IN THE ROAD TO JALEACA FROM POINT WHERE ROAD TRIFURCATE TO PTO. DEL GALLO / YEXTLA / ANDIALEACA.COMMING FROM CARRIZAL DE BRAVO / IN RIVER UNDER THE BRIDGE | 17.5324   | -99.8994    | 2,267,946            | 2347 | 663.6              | 4919        | 33.4                   | 83                    | 28               | MH899570        |
| MK 770       | UMMZ 239802 | <i>Plectrohyla hazelae</i>      | OAXACA    | EL PUNTO SIERRA JUAREZ                                                                                                                                             | 17.22156  | -96.58386   | 538,500              | 2066 | 526.2              | 557         | 5.9                    | 44                    | 29               | MH899569        |
| MK 667       | UMMZ 239952 | <i>Sarcophya arborescendens</i> | VERACRUZ  | PUERTO DEL AIRE (ARRIBA DE ALCUTZINGO)                                                                                                                             | 18.6787   | -97.3485    | 923,330              | 2116 | 511.8              | 1154        | 9.0                    | 69                    |                  | MH899576        |
| MK 700 (1)   | UMMZ 239813 | <i>Sarcophya cyclada</i>        | PUEBLA    | IN THE STREAM LOCATED AFTER THE TOWN OF ZQUITLAN TURNING DOWN AT THE CENTRO DE SALUD                                                                               | 18.322    | -97.0285    | 2,490,616            | 2385 | 661.4              | 2961        | 18.4                   | 82                    |                  |                 |
| MK 701       | UMMZ 239814 | <i>Sarcophya cyclada</i>        | OAXACA    | 24 KMS FROM THE TOWN OF TEOITILAN DE FLORES MAGON VIA HUAUTLA DE JIMENEZ                                                                                           | 18.1781   | -97.0054    | 1,166,574            | 2129 | 565.5              | 1061        | 8.7                    | 69                    |                  |                 |
| MK 742 (1)   | UMMZ 239954 | <i>Sarcophya arborescendens</i> | VERACRUZ  | LEFT ROAD BIFURCATING FROM ROAD TO THE TOWN OF "LAS MINAS"                                                                                                         | 19.6758   | -97.1751    | 1,074,225            | 2240 | 553.8              | 1750        | 12.0                   | 79                    |                  |                 |
| MK 768       | UMMZ 239833 | <i>Exerodonta xera</i>          | PUEBLA    | 5 KM SW ZAPOTITLAN DE SALINAS                                                                                                                                      | 18.311958 | -97.51266   | 1,257,938            | 2288 | 581.5              | 3506        | 21.4                   | 84                    |                  |                 |

4

5 **Additional Files**

6 Fig. S1. Sampled and unsampled parts of *S. bistincta* range in relation to known distributions (or  
 7 localities, where distributional information is lacking) of other *Sarcohylla* species.

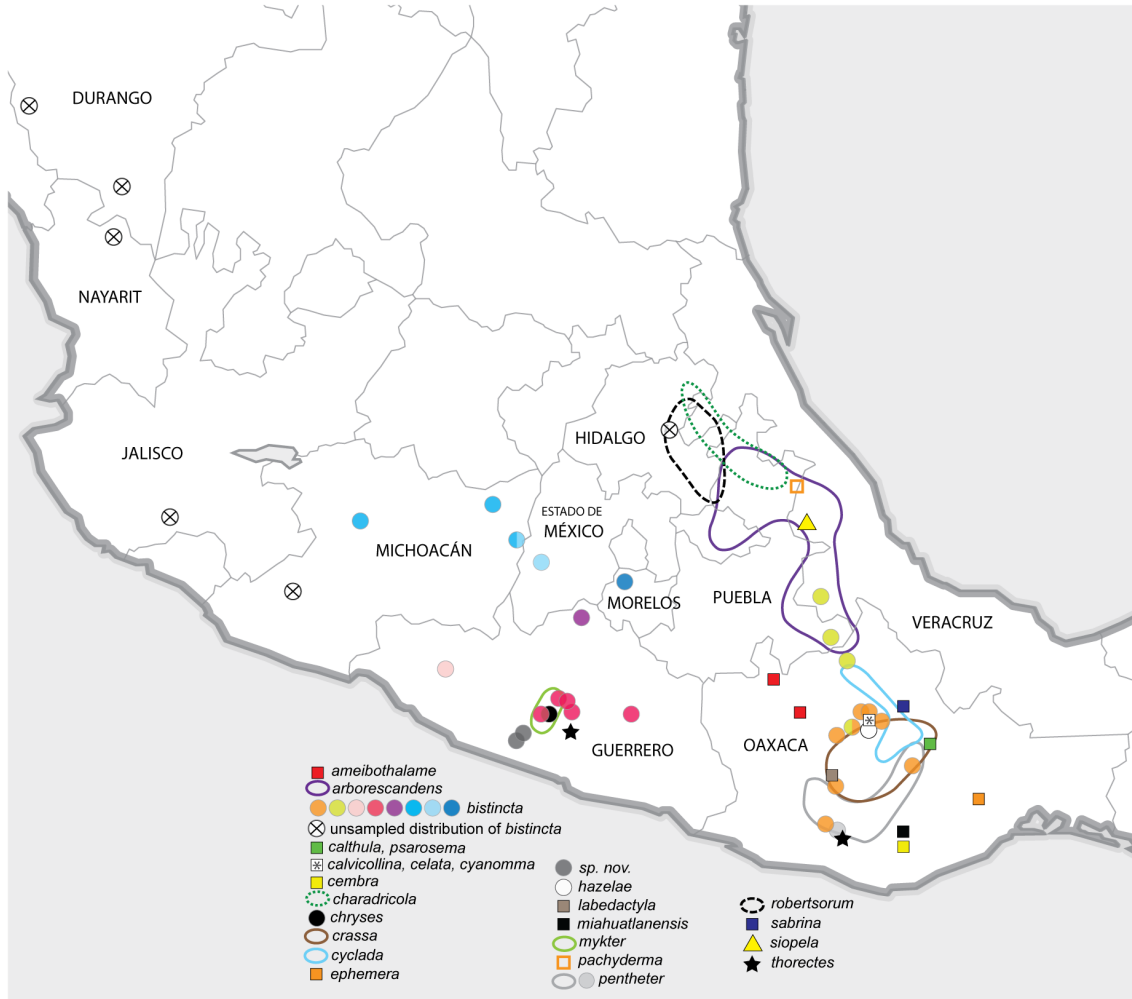

8  
 9  
 10  
 11  
 12  
 13  
 14  
 15

16 Fig. S2. UCE tree of 45 samples of *Sarcohyla* and outgroup *Exerodonta xera* used to determine the  
17 ingroup.

18

19

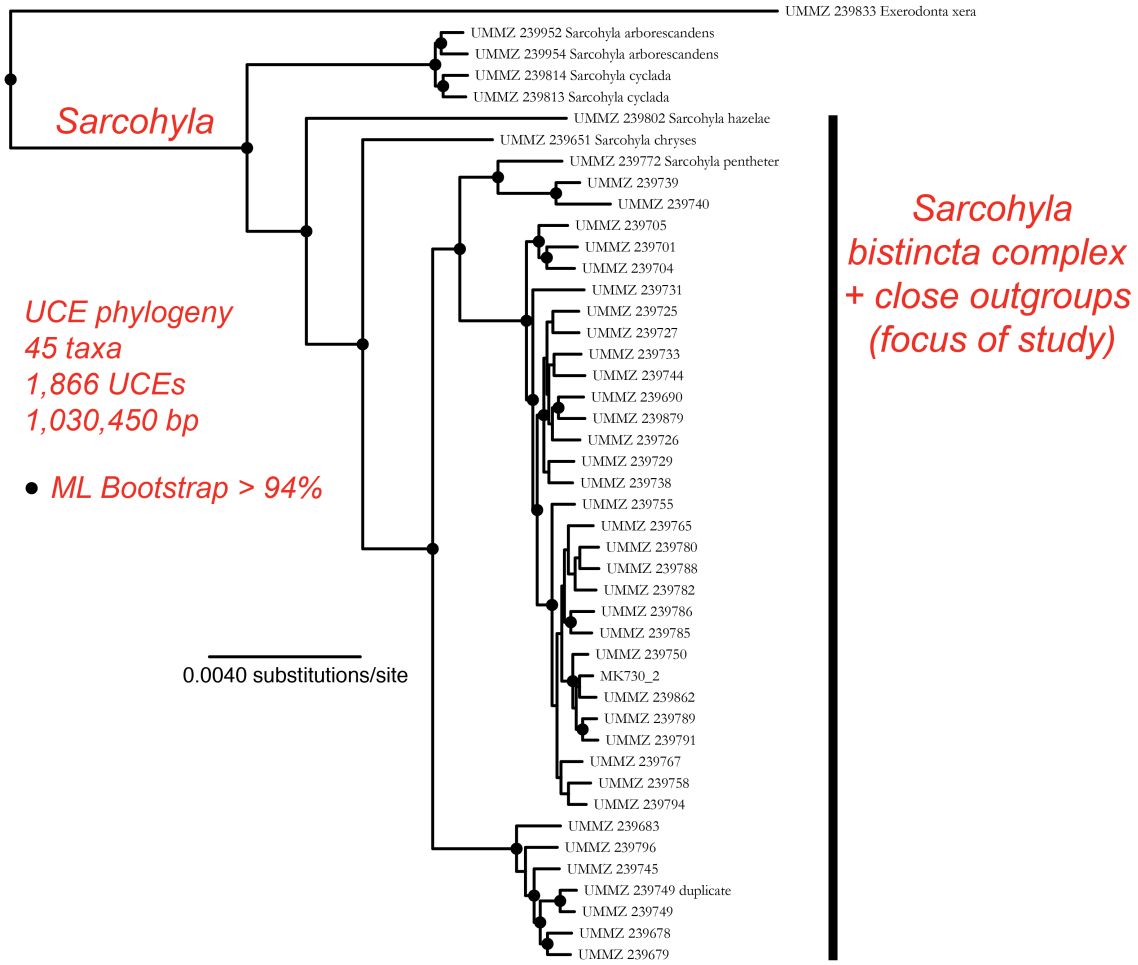

20
